# Supplementary material for: Genome-wide mapping of matrix attachment regions in Drosophila melanogaster
Source: PubMed Central journal article supplement (PMC4301625; doi:10.1186/1471-2164-15-1022), 2014-11-25
Supplement: 12864_2014_6839_MOESM2_ESM.pdf [file 12864_2014_6839_MOESM2_ESM.pdf]

**Supplementary Table 1: Enrichment of known MAR\_DNA features**

| <b>S. No.</b> | <b>Feature</b>           | <b>Associated Motif*</b>                                                                                                                                                                                                           | <b>In % of MARs†</b> |
|---------------|--------------------------|------------------------------------------------------------------------------------------------------------------------------------------------------------------------------------------------------------------------------------|----------------------|
| 1             | Origin of replication    | ATTA, ATTTA, ATTTTA                                                                                                                                                                                                                | 94.7                 |
| 2             | H-rule/ATC rule          | H <sub>20</sub>                                                                                                                                                                                                                    | 93.5                 |
| 3             | AT-Rich Signal           | W <sub>6</sub> N <sub>8-12</sub> W <sub>6</sub>                                                                                                                                                                                    | 74.3                 |
| 4             | TG-rich signal           | TGTTTTG, TGTTTTTTG, TTTTGGGG                                                                                                                                                                                                       | 29.2                 |
| 5             | Curved DNA               | A <sub>4</sub> N <sub>7</sub> A <sub>3</sub> N <sub>7</sub> A <sub>4</sub> , T <sub>4</sub> N <sub>7</sub> T <sub>3</sub> N <sub>7</sub> T <sub>4</sub> , TTTAAA                                                                   | 51.0                 |
| 6             | Kinked DNA               | TAN <sub>3</sub> TGN <sub>3</sub> CA, TAN <sub>3</sub> CAN <sub>3</sub> TG, TGN <sub>3</sub> TAN <sub>3</sub> CA, TGN <sub>3</sub> CAN <sub>3</sub> TA, CAN <sub>3</sub> TAN <sub>3</sub> TG, CAN <sub>3</sub> TGN <sub>3</sub> TA | 30.3                 |
| 7             | Base un-pairing sequence | AATATATTT                                                                                                                                                                                                                          | 1.7                  |
| 8             | dTopo binding site       | GTNWAYATTNATNNR                                                                                                                                                                                                                    | 0.5                  |
| 9             | MRS Signature            | AATAAYAA, AWWRTAANNWWGNNNC                                                                                                                                                                                                         | 15.0                 |

\* Motif sequences are defined as IUPAC code for DNA. The subscript numbers indicate stretch of a nucleotide that is required.

† The percentage of MARs that are having one or more motifs in the subset.

**Supplementary Table 2. MAR sequences overlapping with stalled Pol II regions**

| S. No. | Gene    | MAR_ID             | Chromosome | Start    | Stop     |
|--------|---------|--------------------|------------|----------|----------|
| 1      | Gs1     | em_common_peak-2   | chr2L      | 131966   | 132350   |
| 2      | cbt     | em_common_peak-15  | chr2L      | 476775   | 479793   |
| 3      | drongo  | em_common_peak-31  | chr2L      | 850422   | 850804   |
| 4      | kraken  | em_common_peak-33  | chr2L      | 852790   | 853154   |
| 5      | S       | em_common_peak-46  | chr2L      | 1077536  | 1077887  |
| 6      | ast     | em_common_peak-46  | chr2L      | 1077536  | 1077887  |
| 7      | CG4710  | em_common_peak-48  | chr2L      | 1118740  | 1119237  |
| 8      | CG4726  | em_common_peak-49  | chr2L      | 1142970  | 1143465  |
| 9      | CG31666 | em_common_peak-70  | chr2L      | 1651139  | 1651496  |
| 10     | CG18317 | em_common_peak-81  | chr2L      | 1723812  | 1724320  |
| 11     | CG7337  | em_common_peak-86  | chr2L      | 1885009  | 1885305  |
| 12     | GlyP    | em_common_peak-92  | chr2L      | 2130756  | 2131521  |
| 13     | aop     | em_common_peak-93  | chr2L      | 2161365  | 2161900  |
| 14     | Slh     | em_common_peak-99  | chr2L      | 2492896  | 2493181  |
| 15     | oaf     | em_common_peak-99  | chr2L      | 2492896  | 2493181  |
| 16     | CG2991  | em_common_peak-119 | chr2L      | 2862478  | 2862830  |
| 17     | NTPase  | em_common_peak-120 | chr2L      | 2884972  | 2885281  |
| 18     | CG3523  | em_common_peak-130 | chr2L      | 3056401  | 3056884  |
| 19     | Thor    | em_common_peak-151 | chr2L      | 3478252  | 3479586  |
| 20     | CG3714  | em_common_peak-190 | chr2L      | 4196840  | 4197226  |
| 21     | tutl    | em_common_peak-193 | chr2L      | 4282966  | 4283393  |
| 22     | Atet    | em_common_peak-199 | chr2L      | 4333779  | 4334214  |
| 23     | CG15628 | em_common_peak-221 | chr2L      | 4821348  | 4821558  |
| 24     | pgant5  | em_common_peak-235 | chr2L      | 5093355  | 5093601  |
| 25     | Gpdh    | em_common_peak-262 | chr2L      | 5943750  | 5944166  |
| 26     | Pez     | em_common_peak-283 | chr2L      | 6338777  | 6339149  |
| 27     | Cpr     | em_common_peak-283 | chr2L      | 6338777  | 6339149  |
| 28     | nrv1    | em_common_peak-294 | chr2L      | 6786554  | 6787039  |
| 29     | Wnt4    | em_common_peak-319 | chr2L      | 7276797  | 7277380  |
| 30     | CG7134  | em_common_peak-340 | chr2L      | 7810104  | 7810476  |
| 31     | SoxN    | em_common_peak-381 | chr2L      | 8825559  | 8825961  |
| 32     | Trx-2   | em_common_peak-412 | chr2L      | 9613339  | 9613660  |
| 33     | Pka-C1  | em_common_peak-416 | chr2L      | 9698983  | 9699364  |
| 34     | Myo31DF | em_common_peak-464 | chr2L      | 10506512 | 10506828 |
| 35     | CG17124 | em_common_peak-483 | chr2L      | 10755995 | 10756294 |
| 36     | Jhl-21  | em_common_peak-539 | chr2L      | 12055669 | 12056054 |
| 37     | Vha68-2 | em_common_peak-597 | chr2L      | 12974297 | 12974669 |
| 38     | B4      | em_common_peak-617 | chr2L      | 13548818 | 13549442 |
| 39     | CG9008  | em_common_peak-636 | chr2L      | 13779882 | 13780262 |
| 40     | smi35A  | em_common_peak-663 | chr2L      | 14233914 | 14234239 |

|    |            |                     |       |          |          |
|----|------------|---------------------|-------|----------|----------|
| 41 | eIB        | em_common_peak-672  | chr2L | 14409307 | 14409594 |
| 42 | Gli        | em_common_peak-737  | chr2L | 15762491 | 15762888 |
| 43 | Cyt-c-d    | em_common_peak-792  | chr2L | 16715857 | 16716252 |
| 44 | beat-IIIc  | em_common_peak-818  | chr2L | 17260484 | 17260802 |
| 45 | CG6860     | em_common_peak-822  | chr2L | 17383873 | 17384166 |
| 46 | Socs36E    | em_common_peak-853  | chr2L | 18152151 | 18152470 |
| 47 | Fas3       | em_common_peak-855  | chr2L | 18319921 | 18320380 |
| 48 | CG17321    | em_common_peak-882  | chr2L | 18844970 | 18845493 |
| 49 | CG10641    | em_common_peak-893  | chr2L | 18986962 | 18987347 |
| 50 | drl        | em_common_peak-912  | chr2L | 19190260 | 19190646 |
| 51 | TepIV      | em_common_peak-929  | chr2L | 19549489 | 19549944 |
| 52 | Hr39       | em_common_peak-995  | chr2L | 21237090 | 21237429 |
| 53 | Mio        | em_common_peak-997  | chr2L | 21309233 | 21309641 |
| 54 | CG9397     | em_common_peak-1130 | chr2R | 2389436  | 2389653  |
| 55 | Rab2       | em_common_peak-1137 | chr2R | 2584415  | 2585156  |
| 56 | Tsp42Ef    | em_common_peak-1145 | chr2R | 2912341  | 2912796  |
| 57 | Dscam      | em_common_peak-1158 | chr2R | 3269236  | 3269600  |
| 58 | CG1600     | em_common_peak-1161 | chr2R | 3416382  | 3416869  |
| 59 | CG8713     | em_common_peak-1188 | chr2R | 3979128  | 3979507  |
| 60 | Rab-RP1    | em_common_peak-1227 | chr2R | 5073707  | 5074016  |
| 61 | ced-6      | em_common_peak-1239 | chr2R | 5328772  | 5329161  |
| 62 | CG1623     | em_common_peak-1255 | chr2R | 5720635  | 5721079  |
| 63 | CG12214    | em_common_peak-1269 | chr2R | 6045808  | 6046294  |
| 64 | CPTI       | em_common_peak-1282 | chr2R | 6362749  | 6363144  |
| 65 | CG30015    | em_common_peak-1317 | chr2R | 6761985  | 6762384  |
| 66 | CG8964     | em_common_peak-1381 | chr2R | 7912574  | 7912960  |
| 67 | jeb        | em_common_peak-1386 | chr2R | 8006523  | 8006970  |
| 68 | Oda        | em_common_peak-1388 | chr2R | 8056133  | 8056857  |
| 69 | Cam        | em_common_peak-1396 | chr2R | 8146835  | 8147193  |
| 70 | chn        | em_common_peak-1566 | chr2R | 11016225 | 11016529 |
| 71 | Fs         | em_common_peak-1578 | chr2R | 11128900 | 11129231 |
| 72 | Arf51F     | em_common_peak-1580 | chr2R | 11209653 | 11209949 |
| 73 | CG8180     | em_common_peak-1590 | chr2R | 11370102 | 11370393 |
| 74 | CG8253     | em_common_peak-1609 | chr2R | 11736054 | 11736652 |
| 75 | Dg         | em_common_peak-1621 | chr2R | 11985922 | 11986129 |
| 76 | spin       | em_common_peak-1623 | chr2R | 12012434 | 12012617 |
| 77 | CG30463    | em_common_peak-1668 | chr2R | 12618707 | 12619099 |
| 78 | GstS1      | em_common_peak-1685 | chr2R | 12984690 | 12985191 |
| 79 | grh        | em_common_peak-1729 | chr2R | 13711021 | 13711445 |
| 80 | edl        | em_common_peak-1775 | chr2R | 14560704 | 14561422 |
| 81 | Glycogenin | em_common_peak-1914 | chr2R | 17087890 | 17088298 |
| 82 | CG18375    | em_common_peak-1918 | chr2R | 17138228 | 17138599 |
| 83 | CG6437     | em_common_peak-1971 | chr2R | 17963386 | 17964021 |
| 84 | dve        | em_common_peak-1976 | chr2R | 18158241 | 18158728 |
| 85 | wdp        | em_common_peak-1979 | chr2R | 18199192 | 18199504 |

|     |         |                     |       |          |          |
|-----|---------|---------------------|-------|----------|----------|
| 86  | CG13506 | em_common_peak-1983 | chr2R | 18270433 | 18270929 |
| 87  | CG33143 | em_common_peak-2001 | chr2R | 18501789 | 18502127 |
| 88  | jbug    | em_common_peak-2012 | chr2R | 18616525 | 18616882 |
| 89  | nahoda  | em_common_peak-2017 | chr2R | 18783580 | 18783962 |
| 90  | CG9896  | em_common_peak-2019 | chr2R | 18886156 | 18886512 |
| 91  | CG11299 | em_common_peak-2049 | chr2R | 19601240 | 19601761 |
| 92  | CG30419 | em_common_peak-2067 | chr2R | 20117176 | 20117661 |
| 93  | zip     | em_common_peak-2087 | chr2R | 20898674 | 20899030 |
| 94  | CG13893 | em_common_peak-2131 | chr3L | 603821   | 604161   |
| 95  | CG13894 | em_common_peak-2140 | chr3L | 698842   | 699242   |
| 96  | CG32333 | em_common_peak-2170 | chr3L | 1275862  | 1276215  |
| 97  | rho     | em_common_peak-2182 | chr3L | 1463400  | 1464055  |
| 98  | cue     | em_common_peak-2190 | chr3L | 1517032  | 1517360  |
| 99  | Psa     | em_common_peak-2190 | chr3L | 1517032  | 1517360  |
| 100 | CG13921 | em_common_peak-2195 | chr3L | 1746753  | 1747231  |
| 101 | CG15822 | em_common_peak-2214 | chr3L | 2163675  | 2163904  |
| 102 | Shab    | em_common_peak-2258 | chr3L | 2894848  | 2895552  |
| 103 | scrt    | em_common_peak-2326 | chr3L | 3983987  | 3984284  |
| 104 | CG14998 | em_common_peak-2333 | chr3L | 4134034  | 4134499  |
| 105 | nab     | em_common_peak-2335 | chr3L | 4160824  | 4161309  |
| 106 | Ero1L   | em_common_peak-2337 | chr3L | 4170248  | 4170362  |
| 107 | Impl2   | em_common_peak-2340 | chr3L | 4226884  | 4227425  |
| 108 | CG18314 | em_common_peak-2346 | chr3L | 4380113  | 4380627  |
| 109 | lin-28  | em_common_peak-2432 | chr3L | 5647661  | 5648019  |
| 110 | vvl     | em_common_peak-2489 | chr3L | 6783202  | 6783536  |
| 111 | sgl     | em_common_peak-2508 | chr3L | 6957480  | 6958027  |
| 112 | CG33556 | em_common_peak-2516 | chr3L | 7087741  | 7088223  |
| 113 | CdsA    | em_common_peak-2601 | chr3L | 8121151  | 8121753  |
| 114 | ImpE1   | em_common_peak-2611 | chr3L | 8365133  | 8365483  |
| 115 | h       | em_common_peak-2634 | chr3L | 8668700  | 8669143  |
| 116 | CG32041 | em_common_peak-2674 | chr3L | 9367137  | 9368094  |
| 117 | Hsp26   | em_common_peak-2675 | chr3L | 9369289  | 9370771  |
| 118 | Hsp23   | em_common_peak-2676 | chr3L | 9375000  | 9375854  |
| 119 | LanB2   | em_common_peak-2694 | chr3L | 9607946  | 9608276  |
| 120 | CG32062 | em_common_peak-2747 | chr3L | 10509024 | 10509360 |
| 121 | CG32066 | em_common_peak-2766 | chr3L | 10653852 | 10654165 |
| 122 | simj    | em_common_peak-2767 | chr3L | 10657788 | 10658101 |
| 123 | tna     | em_common_peak-2789 | chr3L | 10850823 | 10851677 |
| 124 | klu     | em_common_peak-2806 | chr3L | 11001990 | 11002371 |
| 125 | CG32082 | em_common_peak-2810 | chr3L | 11129034 | 11129359 |
| 126 | CG18490 | em_common_peak-2815 | chr3L | 11208664 | 11208987 |
| 127 | chrB    | em_common_peak-2841 | chr3L | 11480495 | 11481420 |
| 128 | CG6083  | em_common_peak-2853 | chr3L | 11619229 | 11619534 |
| 129 | CG11658 | em_common_peak-2856 | chr3L | 11701386 | 11701765 |
| 130 | CG32105 | em_common_peak-2885 | chr3L | 12321646 | 12322049 |

|     |           |                     |       |          |          |
|-----|-----------|---------------------|-------|----------|----------|
| 131 | CG32111   | em_common_peak-2905 | chr3L | 12620787 | 12621271 |
| 132 | CG32130   | em_common_peak-2948 | chr3L | 13470454 | 13471907 |
| 133 | bru-3     | em_common_peak-2965 | chr3L | 13659438 | 13659974 |
| 134 | btl       | em_common_peak-2985 | chr3L | 14070140 | 14070403 |
| 135 | fz        | em_common_peak-2990 | chr3L | 14267377 | 14267705 |
| 136 | CG9238    | em_common_peak-2998 | chr3L | 14543937 | 14544224 |
| 137 | ome       | em_common_peak-3004 | chr3L | 14699658 | 14700032 |
| 138 | Toll-6    | em_common_peak-3033 | chr3L | 15329899 | 15330269 |
| 139 | CG6498    | em_common_peak-3044 | chr3L | 15558468 | 15558881 |
| 140 | comm      | em_common_peak-3054 | chr3L | 15721247 | 15721337 |
| 141 | Baldspot  | em_common_peak-3110 | chr3L | 16654379 | 16654762 |
| 142 | Galpha73B | em_common_peak-3111 | chr3L | 16660876 | 16661248 |
| 143 | Eip75B    | em_common_peak-3178 | chr3L | 17992339 | 17992773 |
| 144 | CG6896    | em_common_peak-3196 | chr3L | 18618975 | 18619259 |
| 145 | CG32227   | em_common_peak-3289 | chr3L | 20288045 | 20288453 |
| 146 | CG4786    | em_common_peak-3296 | chr3L | 20533275 | 20533689 |
| 147 | fng       | em_common_peak-3316 | chr3L | 20942523 | 20942812 |
| 148 | Eip78C    | em_common_peak-3337 | chr3L | 21233404 | 21233764 |
| 149 | CG33291   | em_common_peak-3349 | chr3L | 21637934 | 21638299 |
| 150 | mub       | em_common_peak-3353 | chr3L | 21872598 | 21872897 |
| 151 | olf413    | em_common_peak-3361 | chr3L | 22129104 | 22129439 |
| 152 | CG11739   | em_common_peak-3436 | chr3R | 204442   | 204939   |
| 153 | CG31531   | em_common_peak-3442 | chr3R | 485193   | 485605   |
| 154 | Cdep      | em_common_peak-3460 | chr3R | 736093   | 736606   |
| 155 | corto     | em_common_peak-3471 | chr3R | 912092   | 912847   |
| 156 | lab       | em_common_peak-3512 | chr3R | 2503632  | 2504057  |
| 157 | CG8036    | em_common_peak-3595 | chr3R | 4495278  | 4495483  |
| 158 | l(3)10615 | em_common_peak-3644 | chr3R | 5243520  | 5243916  |
| 159 | ps        | em_common_peak-3647 | chr3R | 5262301  | 5262926  |
| 160 | CG31352   | em_common_peak-3667 | chr3R | 5530902  | 5531288  |
| 161 | CG11870   | em_common_peak-3691 | chr3R | 6089874  | 6090275  |
| 162 | pros      | em_common_peak-3759 | chr3R | 7198347  | 7198779  |
| 163 | CG14709   | em_common_peak-3766 | chr3R | 7394869  | 7395200  |
| 164 | Lk6       | em_common_peak-3783 | chr3R | 7589428  | 7590085  |
| 165 | Hsp70Aa   | em_common_peak-3793 | chr3R | 7779883  | 7782306  |
| 166 | Hsp70Ab   | em_common_peak-3794 | chr3R | 7784220  | 7786637  |
| 167 | Hsp70Ba   | em_common_peak-3814 | chr3R | 8291280  | 8293650  |
| 168 | Hsp70Bbb  | em_common_peak-3815 | chr3R | 8328237  | 8330472  |
| 169 | Hsp70Bb   | em_common_peak-3816 | chr3R | 8331501  | 8333761  |
| 170 | Hsp70Bc   | em_common_peak-3817 | chr3R | 8334701  | 8337079  |
| 171 | CG8790    | em_common_peak-3849 | chr3R | 9190527  | 9190994  |
| 172 | CG7886    | em_common_peak-3945 | chr3R | 10468317 | 10468714 |
| 173 | Tm1       | em_common_peak-3991 | chr3R | 11116727 | 11117658 |
| 174 | CG6006    | em_common_peak-4032 | chr3R | 11983732 | 11984140 |
| 175 | Abd-B     | em_common_peak-4063 | chr3R | 12759784 | 12760282 |

|     |          |                     |       |          |          |
|-----|----------|---------------------|-------|----------|----------|
| 176 | Dad      | em_common_peak-4067 | chr3R | 12879526 | 12879970 |
| 177 | gukh     | em_common_peak-4181 | chr3R | 14810014 | 14810757 |
| 178 | CG6231   | em_common_peak-4219 | chr3R | 15446569 | 15446976 |
| 179 | bnl      | em_common_peak-4232 | chr3R | 15662337 | 15662744 |
| 180 | CG17273  | em_common_peak-4260 | chr3R | 16655712 | 16656469 |
| 181 | Atpalpha | em_common_peak-4267 | chr3R | 16783300 | 16783787 |
| 182 | slou     | em_common_peak-4287 | chr3R | 17382947 | 17383494 |
| 183 | glec     | em_common_peak-4309 | chr3R | 17681754 | 17682148 |
| 184 | CG5346   | em_common_peak-4356 | chr3R | 18354087 | 18354444 |
| 185 | pnt      | em_common_peak-4407 | chr3R | 19120859 | 19121294 |
| 186 | CG31145  | em_common_peak-4436 | chr3R | 19495135 | 19495557 |
| 187 | Pli      | em_common_peak-4447 | chr3R | 19715504 | 19715825 |
| 188 | Gdh      | em_common_peak-4452 | chr3R | 19768321 | 19768751 |
| 189 | Hsp68    | em_common_peak-4459 | chr3R | 19880371 | 19883020 |
| 190 | CG17786  | em_common_peak-4472 | chr3R | 20044226 | 20044718 |
| 191 | jar      | em_common_peak-4476 | chr3R | 20096675 | 20096993 |
| 192 | CG6356   | em_common_peak-4477 | chr3R | 20109464 | 20109916 |
| 193 | CG5789   | em_common_peak-4492 | chr3R | 20369431 | 20369686 |
| 194 | CG5807   | em_common_peak-4508 | chr3R | 20639605 | 20639938 |
| 195 | CG31121  | em_common_peak-4511 | chr3R | 20719833 | 20720231 |
| 196 | CG11069  | em_common_peak-4511 | chr3R | 20719833 | 20720231 |
| 197 | fd96Cb   | em_common_peak-4525 | chr3R | 20920602 | 20920878 |
| 198 | Fur1     | em_common_peak-4540 | chr3R | 21298531 | 21298859 |
| 199 | LpR2     | em_common_peak-4549 | chr3R | 21565894 | 21566251 |
| 200 | Tsp96F   | em_common_peak-4556 | chr3R | 21706863 | 21707151 |
| 201 | HLHmbeta | em_common_peak-4559 | chr3R | 21830840 | 21831909 |
| 202 | dei      | em_common_peak-4579 | chr3R | 22266205 | 22266872 |
| 203 | CG5455   | em_common_peak-4582 | chr3R | 22287106 | 22287437 |
| 204 | Tl       | em_common_peak-4607 | chr3R | 22624665 | 22625065 |
| 205 | T48      | em_common_peak-4615 | chr3R | 22707402 | 22707709 |
| 206 | Apc      | em_common_peak-4721 | chr3R | 24670605 | 24670819 |
| 207 | CG14509  | em_common_peak-4738 | chr3R | 25020161 | 25020604 |
| 208 | SP1029   | em_common_peak-4741 | chr3R | 25075851 | 25076184 |
| 209 | CG9743   | em_common_peak-4792 | chr3R | 26028448 | 26028843 |
| 210 | CG31012  | em_common_peak-4825 | chr3R | 26634209 | 26635003 |
| 211 | fz3      | em_common_peak-4925 | chrX  | 663990   | 664303   |
| 212 | dnc      | em_common_peak-5160 | chrX  | 3150038  | 3150880  |
| 213 | AlstR    | em_common_peak-5246 | chrX  | 3468491  | 3468786  |
| 214 | CG32781  | em_common_peak-5280 | chrX  | 3642827  | 3643174  |
| 215 | peb      | em_common_peak-5402 | chrX  | 4511357  | 4511706  |
| 216 | ctp      | em_common_peak-5409 | chrX  | 4582178  | 4582493  |
| 217 | CG6986   | em_common_peak-5413 | chrX  | 4601868  | 4602160  |
| 218 | ovo      | em_common_peak-5480 | chrX  | 4942345  | 4942895  |
| 219 | CG15465  | em_common_peak-5511 | chrX  | 5068787  | 5069268  |
| 220 | CG3097   | em_common_peak-5599 | chrX  | 5664466  | 5664941  |

|     |           |                     |      |          |          |
|-----|-----------|---------------------|------|----------|----------|
| 221 | CG15765   | em_common_peak-5602 | chrX | 5712472  | 5712922  |
| 222 | Grip      | em_common_peak-5621 | chrX | 5860278  | 5860676  |
| 223 | l(1)G0030 | em_common_peak-5651 | chrX | 6246258  | 6246613  |
| 224 | CG3960    | em_common_peak-5684 | chrX | 6465794  | 6466153  |
| 225 | CG4615    | em_common_peak-5740 | chrX | 6995936  | 6996330  |
| 226 | Tbh       | em_common_peak-5848 | chrX | 7889634  | 7890079  |
| 227 | CG32711   | em_common_peak-5908 | chrX | 8303720  | 8304078  |
| 228 | Nrg       | em_common_peak-5924 | chrX | 8411322  | 8411967  |
| 229 | CG12075   | em_common_peak-5984 | chrX | 8757867  | 8758360  |
| 230 | CG15316   | em_common_peak-6087 | chrX | 9393607  | 9394093  |
| 231 | CG32700   | em_common_peak-6095 | chrX | 9445014  | 9445370  |
| 232 | l(1)G0320 | em_common_peak-6096 | chrX | 9447436  | 9447833  |
| 233 | Hex-A     | em_common_peak-6097 | chrX | 9479973  | 9480393  |
| 234 | spri      | em_common_peak-6228 | chrX | 10478997 | 10479638 |
| 235 | CG32676   | em_common_peak-6243 | chrX | 10638664 | 10639047 |
| 236 | ras       | em_common_peak-6243 | chrX | 10638664 | 10639047 |
| 237 | Ptp10D    | em_common_peak-6330 | chrX | 11515887 | 11516280 |
| 238 | fw        | em_common_peak-6364 | chrX | 11897420 | 11898169 |
| 239 | Tis11     | em_common_peak-6451 | chrX | 12553395 | 12553726 |
| 240 | CG15745   | em_common_peak-6519 | chrX | 13199436 | 13199799 |
| 241 | l(1)G0469 | em_common_peak-6653 | chrX | 14105156 | 14105575 |
| 242 | NetB      | em_common_peak-6724 | chrX | 14643128 | 14643505 |
| 243 | rut       | em_common_peak-6735 | chrX | 14719496 | 14720158 |
| 244 | Lsd-2     | em_common_peak-6744 | chrX | 14969679 | 14970324 |
| 245 | CG9095    | em_common_peak-6755 | chrX | 15056479 | 15057308 |
| 246 | l(1)G0168 | em_common_peak-6785 | chrX | 15393195 | 15393663 |
| 247 | sog       | em_common_peak-6796 | chrX | 15520215 | 15520757 |
| 248 | sd        | em_common_peak-6809 | chrX | 15706331 | 15706888 |
| 249 | Tob       | em_common_peak-6827 | chrX | 15984782 | 15985185 |
| 250 | CG9216    | em_common_peak-6830 | chrX | 15998342 | 15998835 |
| 251 | CG4829    | em_common_peak-6906 | chrX | 16711023 | 16711728 |
| 252 | wupA      | em_common_peak-7021 | chrX | 18010579 | 18010902 |
| 253 | l(1)G0003 | em_common_peak-7071 | chrX | 18540975 | 18541393 |
| 254 | CG32541   | em_common_peak-7088 | chrX | 18824334 | 18824753 |
| 255 | CG8062    | em_common_peak-7136 | chrX | 19215856 | 19216292 |
| 256 | kek5      | em_common_peak-7140 | chrX | 19246777 | 19247456 |
| 257 | CG14207   | em_common_peak-7168 | chrX | 19499128 | 19499526 |

**Supplementary Table 3. SSRs in MAR sequences**

| <b>SSR</b>    | <b>Genomic occurrences</b> | <b>Expected occurrence *</b> | <b>Actual occurrence</b> | <b>% as MAR</b> | <b>Fold Enrichment</b> |
|---------------|----------------------------|------------------------------|--------------------------|-----------------|------------------------|
| <b>A</b>      | <b>15617</b>               | <b>407.6</b>                 | <b>4573</b>              | <b>29.3</b>     | <b>11.2</b>            |
| <b>AC</b>     | <b>9075</b>                | <b>236.9</b>                 | <b>581</b>               | <b>6.4</b>      | <b>2.5</b>             |
| <b>AGC</b>    | <b>4804</b>                | <b>125.4</b>                 | <b>364</b>               | <b>7.6</b>      | <b>2.9</b>             |
| <b>AAC</b>    | <b>2493</b>                | <b>65.1</b>                  | <b>165</b>               | <b>6.6</b>      | <b>2.5</b>             |
| <b>AG</b>     | <b>2279</b>                | <b>59.5</b>                  | <b>366</b>               | <b>16.1</b>     | <b>6.2</b>             |
| <b>C</b>      | <b>2025</b>                | <b>52.9</b>                  | <b>558</b>               | <b>27.6</b>     | <b>10.6</b>            |
| <b>AAAAAT</b> | <b>1380</b>                | <b>36.0</b>                  | <b>124</b>               | <b>9.0</b>      | <b>3.4</b>             |
| <b>AAAAAC</b> | <b>1147</b>                | <b>29.9</b>                  | <b>126</b>               | <b>11.0</b>     | <b>4.2</b>             |
| <b>AACAGC</b> | <b>1041</b>                | <b>27.2</b>                  | <b>62</b>                | <b>6.0</b>      | <b>2.3</b>             |
| <b>AAAC</b>   | <b>1013</b>                | <b>26.4</b>                  | <b>56</b>                | <b>5.5</b>      | <b>2.1</b>             |
| <b>ACC</b>    | 868                        | 22.7                         | 63                       | 7.3             | 2.8                    |
| <b>AGG</b>    | 805                        | 21.0                         | 53                       | 6.6             | 2.5                    |
| <b>AAG</b>    | 619                        | 16.2                         | 34                       | 5.5             | 2.1                    |
| <b>AAAATG</b> | 617                        | 16.1                         | 41                       | 6.6             | 2.5                    |
| <b>AAAAAG</b> | 496                        | 12.9                         | 86                       | 17.3            | 6.6                    |
| <b>CCG</b>    | 444                        | 11.6                         | 25                       | 5.6             | 2.2                    |
| <b>AAAAGC</b> | 425                        | 11.1                         | 27                       | 6.4             | 2.4                    |
| <b>ACG</b>    | 402                        | 10.5                         | 27                       | 6.7             | 2.6                    |
| <b>AAAACC</b> | 367                        | 9.6                          | 24                       | 6.5             | 2.5                    |
| <b>AACC</b>   | 355                        | 9.3                          | 19                       | 5.4             | 2.1                    |
| <b>AAACTG</b> | 345                        | 9.0                          | 18                       | 5.2             | 2.0                    |
| <b>AAAGCC</b> | 304                        | 7.9                          | 16                       | 5.3             | 2.0                    |
| <b>AAAG</b>   | 295                        | 7.7                          | 27                       | 9.2             | 3.5                    |
| <b>AAAACG</b> | 248                        | 6.5                          | 18                       | 7.3             | 2.8                    |
| <b>AAACCG</b> | 232                        | 6.1                          | 13                       | 5.6             | 2.1                    |
| <b>AGGGGG</b> | 230                        | 6.0                          | 31                       | 13.5            | 5.2                    |
| <b>AAAAT</b>  | 224                        | 5.8                          | 37                       | 16.5            | 6.3                    |
| <b>AAAAGG</b> | 216                        | 5.6                          | 33                       | 15.3            | 5.9                    |
| <b>ACACTC</b> | 215                        | 5.6                          | 14                       | 6.5             | 2.5                    |
| <b>AAGGAG</b> | 203                        | 5.3                          | 21                       | 10.3            | 4.0                    |
| <b>AGCGGC</b> | 201                        | 5.2                          | 11                       | 5.5             | 2.1                    |
| <b>AAAGAG</b> | 198                        | 5.2                          | 21                       | 10.6            | 4.1                    |
| <b>ACCC</b>   | 190                        | 5.0                          | 11                       | 5.8             | 2.2                    |
| <b>AAGCAG</b> | 188                        | 4.9                          | 11                       | 5.9             | 2.2                    |
| <b>ACACCC</b> | 172                        | 4.5                          | 15                       | 8.7             | 3.3                    |
| <b>AAACCC</b> | 169                        | 4.4                          | 14                       | 8.3             | 3.2                    |



|        |     |     |    |      |     |
|--------|-----|-----|----|------|-----|
| AACTCC | 162 | 4.2 | 9  | 5.6  | 2.1 |
| AAAGGC | 160 | 4.2 | 10 | 6.3  | 2.4 |
| AATCG  | 155 | 4.0 | 9  | 5.8  | 2.2 |
| AAAAC  | 151 | 3.9 | 39 | 25.8 | 9.9 |
| ACCAGC | 151 | 3.9 | 8  | 5.3  | 2.0 |
| AACTG  | 139 | 3.6 | 11 | 7.9  | 3.0 |
| AAACG  | 136 | 3.5 | 14 | 10.3 | 3.9 |
| AAACC  | 132 | 3.4 | 24 | 18.2 | 7.0 |
| AGAGCG | 131 | 3.4 | 12 | 9.2  | 3.5 |
| AATAGC | 130 | 3.4 | 9  | 6.9  | 2.7 |
| ACGTCG | 121 | 3.2 | 10 | 8.3  | 3.2 |
| ACAGAG | 119 | 3.1 | 9  | 7.6  | 2.9 |
| ACCCCC | 116 | 3.0 | 11 | 9.5  | 3.6 |
| AACACC | 114 | 3.0 | 8  | 7.0  | 2.7 |
| ACCG   | 112 | 2.9 | 7  | 6.3  | 2.4 |
| AAAGGG | 111 | 2.9 | 14 | 12.6 | 4.8 |
| AATCGC | 109 | 2.8 | 6  | 5.5  | 2.1 |
| AACG   | 107 | 2.8 | 6  | 5.6  | 2.1 |
| AACCAC | 106 | 2.8 | 18 | 17.0 | 6.5 |
| AGCG   | 106 | 2.8 | 12 | 11.3 | 4.3 |
| AACGGC | 105 | 2.7 | 7  | 6.7  | 2.6 |

\* Expected occurrence has been calculated based on the observation that 2.61% of total genomic DNA is MAR.

**Supplementary Table 4. Primers used for amplification of MARs**

|         |           |                               |
|---------|-----------|-------------------------------|
| Lane 1  | CHR2L-F-1 | GACAACAGCAGTCACGGTTC          |
|         | CHR2L-R-1 | CGTCTGGCTAAGTGGTGTGA          |
| Lane 2  | CHR2L-F-2 | ACACTGTCAGAATCCCGCTC          |
|         | CHR2L-R-2 | AAAGCAAAGCTGCGAGTTTC          |
| Lane 3  | CHR2L-F-3 | GCGTTTGAAATGGTTTCGTT          |
|         | CHR2L-R-3 | TCTGTTTCGGTTCTGTAGTGCAT       |
| Lane 4  | CHR2L-F-4 | TTTGATTCCCTTAGTAAGTTTTTCAGAAT |
|         | CHR2L-R-4 | TTCAGCTTGATTTTGCTATTTTT       |
| Lane 5  | CHR2L-F-5 | ATCTTCCTCGGGTCTTTGCT          |
|         | CHR2L-R-5 | AAACGGTTATCGCTCGCTC           |
| Lane 6  | CHR2R-F-1 | GGAGGCTTCTTGCGATTCTA          |
|         | CHR2R-R-1 | GGCGACGACGTTAGTACCTC          |
| Lane 7  | CHR2R-F-2 | TTTTTCCACGTCAAACCACA          |
|         | CHR2R-R-2 | TCATTATGGCCCAAGGAAAG          |
| Lane 8  | CHR2R-F-3 | GGAGCTGGGTTCTTCTTCCT          |
|         | CHR2R-R-3 | CAAGGCAGTGATAGCGACAG          |
| Lane 9  | CHR2R-F-4 | TTCAGCCATGTGCCTAAAAA          |
|         | CHR2R-R-4 | GAGAGCAAAAGGTGACCAGC          |
| Lane 10 | CHR2R-F-5 | GACGGACTGGTGGATGACTT          |
|         | CHR2R-R-5 | CAAACATAACACGACCGACG          |
| Lane 11 | CHR2R-F-6 | ACATTTTGAGCAGCTCCAGG          |
|         | CHR2R-R-6 | ACGACGACGTTGTCCTAAGC          |
| Lane 12 | CHR3L-F-1 | TATCCTTCAGCAGCGTCCTT          |
|         | CHR3L-R-1 | ACATTCCTTTTTGGTGCAGG          |
| Lane 13 | CHR3L-F-2 | GGCTGGATCACAACACACAC          |
|         | CHR3L-R-2 | AAACGTTCAGTTCGCTTTGC          |
| Lane 14 | CHR3L-F-3 | GGGCAATTGTTGATAATATCGTG       |
|         | CHR3L-R-3 | AGGGTGTTTTCTTAATACCTTTAG      |
| Lane 15 | CHR3R-F-1 | AATGCAGCAGGCAGTTTTCT          |
|         | CHR3R-R-1 | TCTTTCAAATCCGCAGGTC           |
| Lane 16 | CHR3R-F-2 | TAGATCCGCCATCGATTCTT          |
|         | CHR3R-R-2 | GGTAAAAGAGCATCTAGACTTCAACC    |
| Lane 17 | CHR4-F-1  | TAGTGTGTGACCGTTTTGGC          |
|         | CHR4-R-1  | CTAACACCCACAAACCACCC          |
| Lane 18 | CHR4-F-2  | CCTTCATTATATAAGTTTTTCGGTCTG   |
|         | CHR4-R-2  | TTGGGATGTTTTGCTGTTTTTC        |
| Lane 19 | CHRX-F-1  | AGCTCTGCTAGCACAACCACT         |

|         |          |                        |
|---------|----------|------------------------|
|         | CHRX-R-1 | TCGACTGGCCTTTAGATGCT   |
| Lane 20 | CHRX-F-3 | TTCCATTTGGAACCTGTCAAG  |
|         | CHRX-R-3 | GCACTCTGGGTCACGGTATT   |
| Lane 21 | CHRX-F-4 | CAGTCTGAGGCTGTTGATCG   |
|         | CHRX-R-4 | AAAAATTGGAACGCACGTC    |
| Lane C1 | CONT-F-1 | GCAGCGTACATCGACTTGAA   |
|         | CONT-R-1 | GCAGAAGAGCAACCGAAGTT   |
| Lane C2 | CONT-F-2 | CAATGTCTCTCGATCTGGCA   |
|         | CONT-R-2 | ATTATGGCCACTTTTGGCTG   |
| Lane C3 | CONT-F-3 | TTAACATCACTTGCCGCAG    |
|         | CONT-R-3 | CCAGAAATCCTAGTTCGCCA   |
| Lane C4 | CONT-F-4 | TGTAAATTTTGTCCAAAGGGC  |
|         | CONT-R-4 | ACATTGAATCGTTGGAAGGC   |
| Lane C5 | CONT-F-5 | ACTCTGCACTTTGGCGTCTT   |
|         | CONT-R-5 | CAGCACTTGTCCCAAGATGA   |
| Lane C6 | CONT-F-6 | ACCACACGAGCCCAATTAAC   |
|         | CONT-R-6 | TTCTGATTGCCAAGGCTTTT   |
| Lane C7 | CONT-F-7 | AATTTTCCACTTTCTGCTGCTC |
|         | CONT-R-7 | TCAGCAAAGCTCCTTTTTCC   |
| Lane C8 | CONT-F-8 | TTGTTTTCCCTTTATTGCCCA  |
|         | CONT-R-8 | GGAGTGGGTGATGAAAGGC    |
